# Supplementary material for: Production and Characterization of Chitosan–Polyanion Nanoparticles by Polyelectrolyte Complexation Assisted by High-Intensity Sonication for the Modified Release of Methotrexate
Source: PubMed Central journal article supplement (PMC7168905; doi:10.3390/ph13010011), 2020-01-08
Supplement: pharmaceuticals-13-00011-s001.pdf [file pharmaceuticals-13-00011-s001.pdf]

**Table S1.** Results from the *post-hoc* Tukey test assessing the effect of polyanion type and polyanion: chitosan ratios on the physicochemical characteristics of chitosan-polyanion nanoparticles (i.e., particle size, PDI, zeta potential and encapsulation efficiency).

| Factor         | Methotrexate-unloaded nanoparticles |         |         | Methotrexate-loaded nanoparticles |         |       |
|----------------|-------------------------------------|---------|---------|-----------------------------------|---------|-------|
|                | Particle size (nm)                  |         |         | Particle size (nm)                |         |       |
|                | level                               | average | group   | level                             | average | group |
| Polyanion type | PAM-18K                             | 217.0   | A       | PAM-2Na                           | 172.5   | A     |
|                | PAM-2Na                             | 198.7   | A B     | PAM-18Na                          | 166.1   | A     |
|                | PAM-2K                              | 172.9   | A B     | PAM-2K                            | 151.6   | A     |
|                | PAM-18Na                            | 156.5   | B       | PAM-18K                           | 145.2   | A     |
| PA: CH ratio   | 0.33                                | 187.3   | A       | 0.33                              | 182.2   | A     |
|                | 0.50                                | 186.9   | A       | 0.67                              | 154.4   | A B   |
|                | 0.67                                | 184.6   | A       | 0.50                              | 139.9   | B     |
| Factor         | Polydispersity                      |         |         | Polydispersity                    |         |       |
|                | level                               | average | group   | level                             | average | group |
| Polyanion type | PAM-18Na                            | 0.396   | A       | PAM-18Na                          | 0.344   | A     |
|                | PAM-18K                             | 0.387   | A       | PAM-18K                           | 0.300   | A B   |
|                | PAM-2Na                             | 0.182   | B       | PM-2Na                            | 0.232   | B C   |
|                | PAM-2K                              | 0.181   | B       | PAM-2K                            | 0.183   | C     |
| PA: CH ratio   | 0.50                                | 0.303   | A       | 0.33                              | 0.288   | A     |
|                | 0.33                                | 0.292   | A       | 0.67                              | 0.270   | A     |
|                | 0.67                                | 0.265   | A       | 0.50                              | 0.237   | A     |
| Factor         | Zeta potential (mV)                 |         |         | Zeta potential (mV)               |         |       |
|                | level                               | average | group   | level                             | average | group |
| Polyanion type | PAM-18Na                            | +31.2   | A       | PAM-18K                           | 39.6    | A     |
|                | PAM-18K                             | +30.5   | A       | PAM-18Na                          | 36.6    | A B   |
|                | PAM-2K                              | +20.6   | B       | PAM-2K                            | 33.3    | B C   |
|                | PAM-2Na                             | +20.0   | B       | PAM-2Na                           | 32.1    | C     |
| PA: CH ratio   | 0.50                                | +30.9   | A       | 0.33                              | 36.5    | A     |
|                | 0.67                                | +23.7   | A B     | 0.50                              | 35.9    | A     |
|                | 0.33                                | +22.2   | B       | 0.67                              | 33.7    | A     |
| Factor         | Encapsulation efficiency (%)        |         |         | Encapsulation efficiency (%)      |         |       |
|                | level                               | average | group   | level                             | average | group |
| Polyanion type | -                                   | -       | - - - - | PAM-2Na                           | 58.9    | A     |
|                | -                                   | -       | - - - - | PAM-2K                            | 49.9    | B     |
|                | -                                   | -       | - - - - | PAM-18Na                          | 44.7    | B     |
|                | -                                   | -       | - - - - | PAM-18K                           | 42.8    | B     |
| PA: CH ratio   | -                                   | -       | - - - - | 0.33                              | 52.2    | A     |
|                | -                                   | -       | - - - - | 0.50                              | 51.9    | A     |
|                | -                                   | -       | - - - - | 0.67                              | 43.2    | B     |

*The means that do not share a letter are significantly different.*
